# Supplementary material for: Terminal Ballistics of Stone-Tipped Atlatl Darts and Arrows: Results From Exploratory Naturalistic Experiments
Source: publisher site journal article supplement (doi:10.1515/opar-2022-0299), 2023-01-01
Supplement: Supplementary file 1 [file opar-2022-0299_sm.xlsx]

## Sheet: ShotRecord
Shot	Arm	Exp	Shooter	WeaponID	Type1	Type2	Type3	Material	MS	MSType	MSType2	Impact	ImpactQ	ImpactLocus	ImactLocus2	m	v_radar	v_radarcorrected	v_video	v	KE	P	a	F	MaxPen	PenThrough	WoundL	TCSA	TCSP	TCSAh	TCSPh	TCSAhPV	TCSPhPV	SD	SDh	SDhPV	Cd	CI	WSA	AR	PR	ARhPV	PRhPV	SR	SA	TLength	CM	BladeL:W	BladeL:T
2	36	Hog1	JG	BRC1	Dart	CornerNotch	Basketmaker	BrazilianAgate	D01	Basketmaker	DartML	hit		back		0.0886	21.5	23.7	24.4	23.7	24.88	2.1			138		138	66.2	51.1	135	54.5			0.00134	0.00066			2.1	705.18	0.77	1.6			1.3		1543		1.52	7.17
4	90	Hog1	JG	BRC1	Dart	CornerNotch	Basketmaker	Jasper	D02	Basketmaker	DartML	hit		thorax		0.0842			23.2	23.2	22.66	1.95			177		177	64.8	49.2	110.4	51.4			0.0013	0.00076			1.8	870.84	1	1.76			1.51		1525	43	1.58	7.04
6	42	Hog1	JG	BRC1	Dart	CornerNotch	Basketmaker	BrazilianAgate	D02	Basketmaker	DartML	hit		thorax		0.087	21	23.2	21	23.2	23.41	2.02			138		138	66.7	47.4	124.2	50.8			0.0013	0.0007			1.7	654.12	0.93	1.58			1.43		1552		2	7.93
7	42	Hog1	JG	BRC1	Dart	CornerNotch	Basketmaker	BrazilianAgate	D02	Basketmaker	DartML	hit		thorax		0.087			23.2	23.2	23.41	2.02			162		162	66.7	47.4	124.2	50.8			0.0013	0.0007			1.7	767.88	0.93	1.58			1.43		1552		2	7.93
16	87	Hog1	JG	BRC1	Dart	CornerNotch	Basketmaker	TXChert	D01	Basketmaker	DartML	hit		thorax		0.0891			22.3	22.3	22.15	1.99			110		110	74.2	57	131.6	59.1			0.0012	0.00068			1.8	627	1.03	1.9			1.43		1522	41	1.93	10.19
17	87	Hog1	JG	BRC1	Dart	CornerNotch	Basketmaker	TXChert	D01	Basketmaker	DartML	hit		back		0.0891			21.7	21.7	20.98	1.93			115		115	74.2	57	131.6	59.1			0.0012	0.00068			1.8	655.5	1.03	1.9			1.43		1522	41	1.93	10.19
21	85	Hog1	JG	BRC1	Dart	CornerNotch	Basketmakeresque	BurlingtonChert	D02	Basketmaker	DartML	hit		abdomen		0.0931									185		185	89.7	48.6	112.7	50			0.00104	0.00083			1.3	899.1	1.28	1.68			1.44		1470	37	2.3	6.79
23	77	Hog1	DP	GBI1	Dart	Lanceolate	Dalton	BurlingtonChert	D04	CaneL	DartML	hit	BevelRotate	back		0.1122	24.1	26.6		26.6	39.69	2.98			180	2	178	85.1	48.3	140.3	52.1			0.00132	0.0008			1.8	859.74	0.68	1.24			0.99		1833	37	2.43	7.57
24	77	Hog1	DP	GBI1	Dart	Lanceolate	Dalton	BurlingtonChert	D04	CaneL	DartML	hit	BevelRotate	thorax		0.1122	24.1	26.6	27.4	26.6	39.69	2.98			324		324	85.1	48.3	140.3	52.1			0.00132	0.0008			1.8	1564.92	0.68	1.24			0.99		1833	37	2.43	7.57
25	77	Hog1	DP	GBI1	Dart	Lanceolate	Dalton	BurlingtonChert	D04	CaneL	DartML	hit	BevelRotate	shoulder		0.1122	25	27.6	27.1	27.6	42.73	3.1			216		216	85.1	48.3	140.3	52.1			0.00132	0.0008			1.8	1043.28	0.68	1.24			0.99		1833	37	2.43	7.57
26	77	Hog1	DP	GBI1	Dart	Lanceolate	Dalton	BurlingtonChert	D04	CaneL	DartML	hit		thorax		0.1122	25.5	28.1	26.1	28.1	44.3	3.15			195		195	85.1	48.3	140.3	52.1			0.00132	0.0008			1.8	941.85	0.68	1.24			0.99		1833	37	2.43	7.57
27	76	Hog1	DP	GBI1	Dart	Lanceolate	Dalton	BurlingtonChert	D05	CaneM	DartML	hit	BevelRotate	thorax		0.1329	23.2	25.6	25.5	25.6	43.55	3.4			209		209	100	52.5	165	56.5			0.00133	0.00081			1.7	1097.25	0.79	1.35			1.09		2020	38	2.8	8.75
28	76	Hog1	DP	GBI1	Dart	Lanceolate	Dalton	BurlingtonChert	D05	CaneM	DartML	hit	BevelRotate	back		0.1329	24.6	27.1	26.5	27.1	48.8	3.6			200		200	100	52.5	165	56.5			0.00133	0.00081			1.7	1050	0.79	1.35			1.09		2020	38	2.8	8.75
29	76	Hog1	DP	GBI1	Dart	Lanceolate	Dalton	BurlingtonChert	D05	CaneM	DartML	hit		thorax		0.1329	25	27.6	25	27.6	50.62	3.67			237		237	100	52.5	165	56.5			0.00133	0.00081			1.7	1244.25	0.79	1.35			1.09		2020	38	2.8	8.75
31	78	Hog1	DP	GBI1	Dart	Lanceolate	Dalton	BurlingtonChert	D05	CaneM	DartML	hit		abdomen		0.131	23.2	25.6	26.4	25.6	42.93	3.35			168		168	98.8	54.2	167.7	58			0.00133	0.00078			1.8	910.56	0.78	1.39			1.09		2015	38	2.38	8.16
34	79	Hog1	JG	GBI1	Dart	Lanceolate	Dalton	BurlingtonChert	D04	CaneL	DartML	hit	BevelRotate	back		0.1066			24.7	24.7	32.52	2.63			113		113	66.2	43.8	117.6	47.6			0.00161	0.00091			2.1	494.94	0.53	1.12			0.99		1813	38	1.67	5.56
35	79	Hog1	JG	GBI1	Dart	Lanceolate	Dalton	BurlingtonChert	D04	CaneL	DartML	hit	BevelRotate	shoulder		0.1066	22	24.3	25.1	24.3	31.47	2.59			153		153	66.2	43.8	117.6	47.6			0.00161	0.00091			2.1	670.14	0.53	1.12			0.99		1813	38	1.67	5.56
36	79	Hog1	JG	GBI1	Dart	Lanceolate	Dalton	BurlingtonChert	D04	CaneL	DartML	hit		thorax		0.1066	20.6	22.7	23.1	22.7	27.46	2.42			196		196	66.2	43.8	117.6	47.6			0.00161	0.00091			2.1	858.48	0.53	1.12			0.99		1813	38	1.67	5.56
37	79	Hog1	JG	GBI1	Dart	Lanceolate	Dalton	BurlingtonChert	D04	CaneL	DartML	hit	BevelRotate	thorax		0.1066			26.1	26.1	36.31	2.78			200		200	66.2	43.8	117.6	47.6			0.00161	0.00091			2.1	876	0.53	1.12			0.99		1813	38	1.67	5.56
38	79	Hog1	JG	GBI1	Dart	Lanceolate	Dalton	BurlingtonChert	D04	CaneL	DartML	hit		shoulder		0.1066	20.1	22.2	23.7	22.2	26.27	2.37			182		182	66.2	43.8	117.6	47.6			0.00161	0.00091			2.1	797.16	0.53	1.12			0.99		1813	38	1.67	5.56
41	84	Hog1	JG	GBI1	Dart	SideNotch	Thebes	BurlingtonChert	D05	CaneM	DartML	hit		abdomen		0.1329	20.1	22.2	22.3	22.2	32.75	2.95			243		243	161.8	79.7	241.8	81.8			0.00082	0.00055			1.6	1936.71	1.28	2.04			1.09		2005	37	1.44	6.75
43	83	Hog1	DP	GBI1	Dart	SideNotch	Thebes	BurlingtonChert	D05	CaneM	DartML	hit		thorax		0.1449	22.8	25.2	26.1	25.2	46.01	3.65			272		272	197.4	95.5	296.1	97.3			0.00073	0.00049			1.6	2597.6	1.54	2.39			1.08		2013	35	1.15	6.43
49	48	Hog1	DP	GBI1	Dart	CornerNotch	Williams	ReedsSpringChert	D05	CaneM	DartML	hit		neck		0.1171	23.2	25.6	26.6	25.6	38.37	3			120		120	114	76.9	191.9	78.6			0.00103	0.00061			2.5	922.8	0.69	1.71			0.95		1944		0.92	5.83
51	27	Hog1	PH	Mag	Dart	Stemmed	Gary	ReedsSpringChert	D04	CaneL	DartML	hit		neck		0.0918	23.7	26.2	26.1	26.2	31.51	2.41			207		207	78	49.7	76.8	49.7			0.00118	0.0012			1.6	1028.79	1.03	1.6			1.27		1743		1.58	5.85
57	19	Hog1	DP	Catawba1	Arrow	CornerNotch	Williams	ReedsSpringChert	A02	Arrow	Arrow	hit		thorax		0.0335									194		194	52	34.5	69.6	36.4			0.00064	0.00048			1.5	669.3	0.8	1.23			1.02		953	40	2.62	6.46
58	9	Hog1	DP	Catawba1	Arrow	CornerNotch	Williams	Siltstone	A02	Arrow	Arrow	hit		thorax		0.0295									176		176	72.2	40.9	92.2	42.7			0.00041	0.00032			1.2	719.84	1.24	1.51			1.08		894	41	1.47	3.68
61	79	Hog1	DP	GBI1	Dart	Lanceolate	Dalton	BurlingtonChert	D04	CaneL	DartML	hit		back		0.1066									282		282	66.2	43.8	117.6	47.6			0.00161	0.00091			2.1	1235.16	0.53	1.12			0.99		1813	38	1.67	5.56
62	79	Hog1	DP	GBI1	Dart	Lanceolate	Dalton	BurlingtonChert	D04	CaneL	DartML	hit		thorax		0.1066									245		245	66.2	43.8	117.6	47.6			0.00161	0.00091			2.1	1073.1	0.53	1.12			0.99		1813	38	1.67	5.56
63	79	Hog1	DP	GBI1	Dart	Lanceolate	Dalton	BurlingtonChert	D04	CaneL	DartML	hit		thorax		0.1066									195		195	66.2	43.8	117.6	47.6			0.00161	0.00091			2.1	854.1	0.53	1.12			0.99		1813	38	1.67	5.56
65	59	Hog1	DP	GBI1	Dart	Lanceolate	Dalton/Holland	Porcelain	D05	CaneM	DartML	hit		thorax		0.1291	18.3	20.2		20.2	26.34	2.61			152		152	109.2	54.6	165.1	57.9			0.00118	0.00078			1.5	829.92	0.93	1.44			1.12		2012		2.23	6.9
94	75	Goat1	DP	Catawba2	Arrow	Stemmed		BurlingtonChert	A04	Arrow	Arrow	hit		thorax		0.026			41	41	21.85	1.07	-2179	57	250		250	36.1	38.8	58	39.9			0.00072	0.00045			1.8	970	1.06	1.94			1.55		802	45	1.37	6.84
108	7	Goat1	DP	GBI2	Dart	Lanceolate	Dalton	ReedsSpringChert	D03	Heavy	DartH	hit		shoulder		0.2013			19	19	36.33	3.82	-1410	284	135		135	82.8	49.9	129.6	52.6	189.6	56.3	0.00243	0.00155	0.00106	2.91	2	673.65	0.63	1.25	1.43	1.38	1.09	1849	2065	43	1.29	4.49
144	97	Goat1	DP	Catawba2	Arrow	CornerNotch		BurlingtonChert	A05	Arrow	Arrow	hit		thorax		0.0244			41	41	20.51	1	-2512	61	437	220	217	27.2	28.4	57.1	32	67.9	32.8	0.0009	0.00043	0.00036	2.7	2	616.28	0.59	1.18	1.46	1.36	1.09	856	856		1.62	5.5
156	91	Goat1	DP	Catawba2	Arrow	Triangular		Obsidian	A06	Arrow	Arrow	hit		thorax		0.0285			42	42	25.14	1.2	-2345	67	310	120	190	63	43.7	105	46.5			0.00045	0.00027			1.4	830.3	1.21	1.75			1.07		883	40	1.76	6.17
160	89	Goat1	DP	Catawba2	Arrow	CornerNotch		BurlingtonChert	A05	Arrow	Arrow	hit		back		0.0295			37	37	20.19	1.09	-1832	54	490	250	240	67.2	49.3	127.2	52.5	133.1	53.9	0.00044	0.00023	0.00022	2.69	1.6	1183.2	1.12	1.83	2.19	1.95	0.95	1969	870	37	2.08	8.93
168	28	Goat1	DP	Kinboko	Dart	CornerNotch	Basketmaker	BrazilianAgate	D09	Basketmaker	DartML	hit		thorax		0.0889			20	20	17.78	1.78	-576	51	119		119	75	51.4	125	53.9			0.00119	0.00071			1.5	611.66	1.19	1.84			1.51		1660	42	1.72	7.17
177	124	Goat2	DP	GBI1	Dart	CornerNotch	Raddatz	Novaculite	D05	CaneM	DartML	hit		abdomen	G2abd	0.12			21.8	21.8	28.51	2.62	-805	97	275		275	141.4	83.2	336.2	88.3	351.1	91.8	0.00085	0.00036	0.00034	2.2	2.2	2288	0.84	1.81	2.07	1.99	0.94	3468	1965	40	1.02	6.09
179	81	Goat2	DP	GBI1	Dart	Lanceolate	Dalton	Porcelain	D05	CaneM	DartML	hit		thorax		0.1143			23.4	23.4	31.29	2.67	-1609	184	330		330	68.6	56.9	170.8	61.1	223.9	62.9	0.00167	0.00067	0.00051	2.97	2.5	1877.7	0.59	1.5	1.92	1.64	1.13	3356	1875	39	1.61	9.18
185	8	Goat2	DP	GBI1	Dart	Lanceolate	Dalton	ReedsSpringChert	D09	Basketmaker	DartML	hit		thorax		0.0966			23.6	23.6	26.9	2.28	-1384	134	210		210	95.7	59.5	145	61.4	146.4	53.4	0.00101	0.00067	0.00066	2.77	1.5	1249.5	1.33	1.98	2.02	1.77	1.42	1588	1648	38	1.24	5.45
187	53	Goat2	DP	Kinboko	Dart	CornerNotch	Basketmaker	IndianAgate	D01	Basketmaker	DartML	hit		abdomen	G2abd	0.0902			24.5	24.5	27.07	2.21	-1137	103	380		380	83.7	55.4	156.6	58.8			0.00108	0.00058			1.9	2105.2	0.77	1.5			1.16		1540	41	1.44	6.29
190	30	Goat2	DP	Kinboko	Dart	CornerNotch	Basketmaker	BrazilianAgate	D01	Basketmaker	DartML	hit		abdomen	G2abd	0.0889			24.8	24.8	27.34	2.2	-938	83	410		410	70.2	53.1	146.9	56.7	170.8	60.8	0.00127	0.00061	0.00052	3.14	2	2177.1	0.84	1.66	2.01	1.86	1.32	2370	1545	42	1.46	7.04
195	25	Goat2	DD		Dart	Stemmed	Gary	ReedsSpringChert	D03	Heavy	DartH	hit		abdomen	G2abd	0.203			24	24	58.46	4.87	-592	120	1070	840	230	107.3	59.9	178.4	63			0.00189	0.00114			1.8	1377.7	0.89	1.58			1.15		2023	42	1.38	5.41
202	56	Goat2	DD		Dart	SideNotch		Basalt	D03	Heavy	DartH	hit		abdomen	G2abd	0.1958			25.1	25.1	61.68	4.91	-749	147	2252	2022	230	65.6	47.4	130	51.3			0.00298	0.00151			2	1090.2	0.67	1.35			1.27		2022	43	1.87	7.54
208	122	Goat2	DP	GBI1	Dart	CornerNotch	Raddatz	Novaculite	D07	CaneH	DartH	hit		thorax		0.1766			23.1	23.1	47.12	4.08	-1365	241	275		275	162	91.1	357.8	95.5			0.00109	0.00049			1.9	2505.25	1.09	2.12			1.15		2146	42	1.04	6.53
209	95	Goat2	DP	GBI1	Dart	CornerNotch	Raddatz	Novaculite	D07	CaneH	DartH	hit		abdomen	G2abd	0.1794			24.5	24.5	53.84	4.4	-742	133	820	440	380	153.7	79.4	280.1	83			0.00117	0.00064			1.8	3017.2	1.07	1.89			1.18		2187	42	1.49	7.34
217	55	Goat2	DP	Kinboko	Dart	CornerNotch	Basketmaker	IndianAgate	D01	Basketmaker	DartML	hit		thorax		0.0872			24	24	25.11	2.09	-1552	135	290		290	75	51.4	141.2	54.9	148.6	58.4	0.00116	0.00062	0.00059	3.16	1.8	1490.6	0.9	1.61	1.78	1.81	1.33	1965	1535	42	1.48	6.17
219	55	Goat2	DP	Kinboko	Dart	CornerNotch	Basketmaker	IndianAgate	D01	Basketmaker	DartML	hit		thorax		0.0872			24.4	24.4	25.96	2.13	-1607	140	360		360	75	51.4	141.2	54.9	148.6	58.4	0.00116	0.00062	0.00059	3.16	1.8	1850.4	0.9	1.61	1.78	1.81	1.33	1965	1535	42	1.48	6.17
227	14	Goat2	DP	Catawba2	Arrow	CornerNotch	Williams	ReedsSpringChert	A04	Arrow	Arrow	hit		abdomen	G2abd	0.0272			39.4	39.4	21.11	1.07	-3378	92	350		350	93.2	48.8	131.1	51.3	150.1	53.7	0.00029	0.00021	0.00018	2.38	1.3	1708	1.24	1.63	1.99	1.75	1.04	1710	710	38	1.22	3.46
232	106	Goat2	DP	GBI1	Dart	CornerNotch	Raddatz	Novaculite	D04	CaneL	DartML	hit		thorax		0.0966			24.8	24.8	29.71	2.4	-1586	153	236		236	86.8	57.4	180.6	61.7			0.00111	0.00053			1.9	1354.64	0.9	1.69			1.14		1779	40	2.04	9.19
250	120	Goat2	DP	GBI1	Dart	SideNotch		BurlingtonChert	D04	CaneL	DartML	hit		abdomen	G2abd	0.0988			22.2	22.2	24.35	2.19	-1679	166	135		135	123.8	67.7	237.6	72	252.5	75.8	0.0008	0.00042	0.00039	2.9	1.6	913.95	1.18	1.88	2.39	2.08	1.09	3216	1726	38	0.91	4
262	152	Bison1	DP	GBI1	Dart	CornerNotch		Dacite	D08	Basketmaker	DartML	hit		shoulder		0.1073			25.1	25.1	33.8	2.69	-1360	146	245		245	92.6	60.1	183.8	63.9	204.8	66.5	0.00116	0.00058	0.00052	3.01	2	1472.45	0.82	1.62	1.81	1.76	1.17	3147	1775	43	1.84	8.57
264	152	Bison1	DP	GBI1	Dart	CornerNotch		Dacite	D08	Basketmaker	DartML	hit		abdomen		0.1073			23.6	23.6	29.88	2.53	-1272	136	434		434	92.6	60.1	183.8	63.9	204.8	66.5	0.00116	0.00058	0.00052	3.01	2	2608.34	0.82	1.62	1.81	1.76	1.17	3147	1775	43	1.84	8.57
267	40	Bison1	DP	Kinboko	Dart	CornerNotch	Basketmaker	BrazilianAgate	D08	Basketmaker	DartML	hit	FSLoose	thorax		0.1021			23.5	23.5	28.19	2.4	-1089	111	350		350	67.2	56.8	159.6	60.5	157.2	63.1	0.00152	0.00064	0.00065	3.41	2.1	1988	0.83	1.78	1.92	1.97	1.37	2353	1792	45	1.29	7.5
268	31	Bison1	DP	Kinboko	Dart	CornerNotch	Basketmaker	BrazilianAgate	D08	Basketmaker	DartML	hit	FSLoose	thorax		0.0992			25.3	25.3	31.75	2.51	-1201	119	272		272	45.2	42.9	112.4	47.1	122.2	48.8	0.00219	0.00088	0.00081	3.4	2.3	1166.88	0.62	1.43	1.65	1.6	1.44	1846	1785	46	1.67	8.14
270	33	Bison1	DP	Kinboko	Dart	CornerNotch	Basketmaker	BrazilianAgate	D01	Basketmaker	DartML	hit		thorax		0.0904			24.5	24.5	27.13	2.21	-548	50	415	52	363	72	49.5	140.4	53.4	147.6	58.3	0.00126	0.00064	0.00061	3.22	1.9	1796.85	0.77	1.46	1.58	1.7	1.26	2186	1580	42	1.71	6.83
271	108	Bison1	DP	Kinboko	Dart	CornerNotch	Raddatz	BurlingtonChert	D01	Basketmaker	DartML	hit		thorax		0.0896			24.8	24.8	27.55	2.22	-1555	139	217		217	87.8	54.8	151.6	57.9	161.3	59.7	0.00102	0.00059	0.00056	3.42	1.4	1189.16	1.31	1.89	2.38	2.04	1.47	2598	1417	38	1.65	6.67
273	34	Bison1	DP	Kinboko	Dart	CornerNotch	Basketmaker	BrazilianAgate	D01	Basketmaker	DartML	hit		back		0.0849			25.6	25.6	27.82	2.17	-702	60	200		200	65	53	130	55.7			0.00131	0.00065			2.1	1060	0.78	1.66			1.33		1512	43	1.27	6.6
276	172	Bison1	JW	SDCI	Dart	Lanceolate	Cody	TXChert	D05	CaneM	DartML	hit		thorax		0.1278			22.8	22.8	33.22	2.91	-1259	161	310		310	97.9	52.6	182	58	239	59.4	0.00131	0.0007	0.00053	3.57	1.6	1630.6	0.87	1.42	2.11	1.58	1.15	5066	2020	39	3.07	9.87
282	127	Bison1	JW	SDCI	Dart	Lanceolate	Cody	TXChert	D05	CaneM	DartML	hit		thorax		0.124			22.9	22.9	32.51	2.84	-1342	166	405		405	92.3	52.7	177.1	57.8	221.2	62.1	0.00134	0.0007	0.00056	3.07	1.7	2134.35	0.82	1.42	1.96	1.65	1.15	3395	1998	39	1.78	6.16
288	51	Bison1	DP	GBI1	Dart	Stemmed	Gary	ReedsSpringChert	D05	CaneM	DartML	hit		thorax		0.1183			24.4	24.4	35.22	2.89	-1432	169	300		300	105	61.6	201	65.7	223.6	70	0.00113	0.00059	0.00053	2.99	1.7	1848	0.96	1.66	2.05	1.89	1.17	3508	1903	39	1.73	7.43
290	136	Bison1	CG	CGMag	Dart	Lanceolate	Cody	BurlingtonChert	D07	CaneH	DartH	hit		abdomen		0.2043			22.9	22.9	53.57	4.68	-1348	275	495		495	116.1	55.2	204.9	60.9	290.6	64.5	0.00176	0.001	0.0007	3.06	1.7	2732.4	0.76	1.28	1.89	1.47	1.14	5336	2246	39	2.38	6.97
291	136	Bison1	CG	CGMag	Dart	Lanceolate	Cody	BurlingtonChert	D07	CaneH	DartH	hit		back		0.2043			25.1	25.1	64.36	5.13	-1200	245	146		146	116.1	55.2	204.9	60.9	290.6	64.5	0.00176	0.001	0.0007	3.06	1.7	805.92	0.76	1.28	1.89	1.47	1.14	5336	2246	39	2.38	6.97
293	170	Bison1	CG	CGMag	Dart	Lanceolate	Winurst	Obsidian	D07	CaneH	DartH	hit		abdomen		0.2278			23.3	23.3	61.84	5.31	-454	103	720	180	540	162	67.8	299.7	74.6	363.8	74.5	0.00141	0.00076	0.00063	3.26	1.7	3661.2	0.81	1.36	1.81	1.48	0.99	9012	2210	35	2.47	8
298	24	Bison1	DD	TSSA	Dart	Stemmed	Gary	ReedsSpringChert	D03	Heavy	DartH	hit	FSLoose	shoulder		0.2021			28	28	79.22	5.66	-714	144	303		303	67.5	51.2	115	53.3	133	56.4	0.00299	0.00176	0.00152	2.99	1.9	1551.36	0.87	1.65	1.69	1.8	1.42	1585	2157	45	1.32	6.11
319	64	Bison1	DP	GBI1	Dart	CornerNotch	Basketmaker	ReedsSpringChert	D04	CaneL	DartML	hit		thorax		0.1059			26.5	26.5	37.18	2.81	-941	100	460		460	79.3	53.4	158.6	57.4	184.2	58	0.00134	0.00067	0.00057	2.93	2.1	2456.4	0.68	1.41	1.58	1.51	1.03	3044	1817	38	1.73	7.38
321	5	Bison1	DP	GBI1	Dart	Lanceolate	Dalton	ReedsSpringChert	D04	CaneL	DartML	hit		back		0.1			26.8	26.8	35.91	2.68	-1424	142	202		202	83	44.9	119.7	47.8	184.1	64.4	0.0012	0.00084	0.00054	3.12	1.4	906.98	0.99	1.4	2.17	1.97	1.21	2745	1776	39	1.81	4.81
322	174	Bison1	CG	DPcustom	Dart	Lanceolate	Clovis	TXChert	D07	CaneH	DartH	hit		abdomen		0.1814			27.3	27.3	67.6	4.95	-1223	222	510		510	85.7	55.8	204	62.1	280.4	64.3	0.00212	0.00089	0.00065	4.35	2.2	2845.8	0.65	1.4	2.11	1.58	1.22	4686	2245	43	1.76	7.62
333	159	Bison1	DP	Cherokee	Arrow	SideNotch		BurlingtonChert	A06	Arrow	Arrow	hit		shoulder		0.0279			39.5	39.5	21.77	1.1	-2350	66	126		126	35.7	37.4	96.1	42.2	120.1	46.3	0.00078	0.00029	0.00023		2.4	471.24	0.58	1.39	1.93	1.66	0.99	1506	875	41	1.97	9.23
334	157	Bison1	DP	Cherokee	Arrow	SideNotch		BurlingtonChert	A05	Arrow	Arrow	hit		shoulder		0.0263			39.4	39.4	20.41	1.04	-2302	61	383		383	40.1	34.8	78.5	38.3	92.1	39.1	0.00066	0.00034	0.00029	2.58	1.7	1332.84	0.8	1.39	1.83	1.56	1.05	1233	874	41	2.16	7.5
335	110	Bison1	DP	Cherokee	Arrow	SideNotch	Cahokia	BurlingtonChert	A06	Arrow	Arrow	hit		thorax		0.0269			37.6	37.6	19.02	1.01	-3339	90	300		300	42.5	38.9	96.4	43	106.7	44.7	0.00063	0.00028	0.00025	2.8	2.1	1167	0.69	1.44	1.72	1.6	0.99	1716	858	41	1.96	8.22
338	94	Bison1	DP	Cherokee	Arrow	BasalNotch		BrazilianAgate	A06	Arrow	Arrow	hit		thorax		0.0256			39.5	39.5	19.97	1.01	-2498	64	337		337	36.8	42.6	87.2	45.2	88.3	47	0.0007	0.00029	0.00029	2.64	2.3	1435.62	0.77	1.78	1.8	1.89	1.11	1171	835	42	1.29	7.71
339	96	Bison1	DP	Cherokee	Arrow	Triangular		BurlingtonChert	A05	Arrow	Arrow	hit		shoulder		0.0235			40.4	40.4	19.18	0.95	-2953	69	310		310	28.1	32	53.8	34.1	70.1	37.5	0.00084	0.00044	0.00034	2.45	2.1	992	0.67	1.39	1.63	1.61	1.14	692	840		1.22	5.28
340	96	Bison1	DP	Cherokee	Arrow	Triangular		BurlingtonChert	A05	Arrow	Arrow	hit		abdomen		0.0235			39.4	39.4	18.24	0.93	-2195	52	453		453	28.1	32	53.8	34.1	70.1	37.5	0.00084	0.00044	0.00034	2.45	2.1	1449.6	0.67	1.39	1.63	1.61	1.14	692	840		1.22	5.28
348	41.1	Bison2	JG	BRC2	Dart	CornerNotch	Basketmaker	BrazilianAgate	D01.1	Basketmaker	DartML	hit		thorax		0.0952	24	26.5	26.4	26.4	33.18	2.51	-1708	163	228		228	55.2	48.9	148.8	54	127.1	54	0.00172	0.00064	0.00075		2.5	1114.92	0.55	1.4	1.27	1.52	1.21	1979	1558
352	135	Bison2	DD	DDEOC	Dart	Lanceolate	Cody	Novaculite	D07.1	CaneH	DartH	hit	FSLoose	abdomen		0.2079	25	27.6	27.9	27.9	80.92	5.8	-1432	298	345		345	101.1	53.6	198.4	59.9	257.7	62.9	0.00206	0.00105	0.00081		1.9	1849.2	0.66	1.25	1.67	1.43	1.3	4650	2230	40
356	244	Bison2	DD	DDEOC	Dart	Lanceolate	AgateBasin	TXChert	D07.1	CaneH	DartH	hit		abdomen		0.1985	25	27.6	27.8	27.8	76.7	5.52	-1305	259	504		504	106.5	56.8	208.4	62.6	244.4	64.2	0.00186	0.00095	0.00081		1.9	2862.72	0.66	1.26	1.5	1.42	1.26	5061	2142	40	1.79	6.28
357	242	Bison2	DD	DDEOC	Dart	Lanceolate	AgateBasin	TXChert	D07.1	CaneH	DartH	hit		abdomen		0.2174	25	27.6	28	28	85.22	6.09	-723	157	645		645	108.9	60.3	230.7	66.4	297.4	70.9	0.002	0.00094	0.00073		2.3	3889.35	0.52	1.18	1.43	1.39	1.12	6317	2197	38	2.02	7.91
358	242	Bison2	DD	DDEOC	Dart	Lanceolate	AgateBasin	TXChert	D07.1	CaneH	DartH	hit		abdomen		0.2174	24	26.5	27.8	27.8	84.01	6.04	-841	183	583		583	108.9	60.3	230.7	66.4	297.4	70.9	0.002	0.00094	0.00073		2.3	3515.49	0.52	1.18	1.43	1.39	1.12	6317	2197	38	2.02	7.91
360	219	Bison2	DD	DDEOC	Dart	Lanceolate	Clovis	Obsidian	D07.1	CaneH	DartH	hit		abdomen		0.1919	25	27.6	27.9	27.9	74.69	5.35	-759	146	596		596	100.8	64.3	288.2	72.9	361.5	78.1	0.0019	0.00067	0.00053		2.7	3832.28	0.45	1.21	1.59	1.46	1.07	4560	2165	42	1.3	6.41
367	231	Bison2	JG	ABhook	Dart	Lanceolate	Folsom	TXChert	D07.1	CaneH	DartH	hit		thorax		0.1912	22	24.3	23.7	23.7	53.7	4.53	-990	189	164		164	46.2	42.9	149.5	50.7	212	56.8	0.00414	0.00128	0.0009		3.7	703.56	0.24	0.89	1.11	1.16	1.17	2620	2124	41	1.19	5.68
369	237	Bison2	JG	ABhook	Dart	Lanceolate	Folsom	Porcelain	D07.1	CaneH	DartH	hit		thorax		0.1928	22	24.3	23.9	23.9	55.06	4.61	-1403	270	221		221	44.5	46.3	179.7	55.4	237.6	59.2	0.00433	0.00107	0.00081		4.5	1023.23	0.19	0.86	0.99	1.08	1.04	2804	2104	40	1.54	8.97
372	240	Bison2	JG	ABhook	Dart	Lanceolate	Folsom	Porcelain	D07.1	CaneH	DartH	hit		abdomen		0.1853	23	25.4	23.8	23.8	52.48	4.41	-824	153	560		560	43.5	45.3	170.6	54.1	242.6	58	0.00426	0.00109	0.00076		4.1	2536.8	0.22	0.91	1.21	1.15	1.14	3046	2125	42	1.52	8.72
379	228	Bison2	JG	ABhook	Dart	Lanceolate	Folsom	Quartzite	D07.1	CaneH	DartH	hit		thorax		0.1983	23	25.4	25.1	25.1	62.47	4.98	-1255	249	394		394	57.1	48.6	206.2	58.9	256.4	62.4	0.00347	0.00096	0.00077		3.4	1914.84	0.29	0.99	1.31	1.26	1.15	3450	2131	40	0.88	4.38
381	171	Bison2	DP	DPBMHeavy	Dart	Lanceolate	Clovis	TXChert	D13	Composite	DartH	hit		abdomen		0.2803	20	22.1	21.5	21.5	64.78	6.03	-1280	359	275		275	104.8	59.2	255.4	67.5	411.7	79.3	0.00267	0.0011	0.00068		2.5	1628	0.43	1.08	1.69	1.43	0.99	5785	1984	37
388	178	Bison2	DP	DPBMHeavy	Dart	Lanceolate	Clovis	TXChert	D13	Composite	DartH	hit		thorax		0.2911	21	23.2	22.8	22.8	75.66	6.64	-1237	360	290		290	126	65	275.6	72.1	391.2	77.5	0.00231	0.00106	0.00074		2.3	1885	0.51	1.18	1.57	1.39	0.98	5436	2034	37
389	224	Bison2	DD	DDEOC	Dart	Lanceolate	Clovis	Novaculite	D13	Composite	DartH	hit		thorax		0.3138	23	25.4	24.7	24.7	95.72	7.75	-2330	731	215		215	188.2	75.3	351.1	82.1	458	85.9	0.00167	0.00089	0.00069		1.8	1618.95	0.75	1.34	1.82	1.53	0.97	8033	2007	34	1.8	6.25
392	221	Bison2	DD	DDEOC	Dart	Lanceolate	Clovis	BuffaloRiverChert	D13	Composite	DartH	hit		thorax		0.3025	25	27.6	27.4	27.4	113.55	8.29	-827	250	519		519	126.1	75.4	343.2	82.9	467.8	88.1	0.0024	0.00088	0.00065		2.6	3913.26	0.54	1.4	1.99	1.62	1.01	6999	2031	36	1.46	7.94
394	222	Bison2	DD	DDEOC	Dart	Lanceolate	Clovis	BuffaloRiverChert	D13	Composite	DartH	hit		thorax		0.29	25	27.6	26.7	26.7	103.37	7.74	-838	243	305	90	215	128.1	69.1	286.8	75.5	359.7	79.1	0.00226	0.00101	0.00081		2.3	1485.65	0.55	1.28	1.53	1.46	1.01	5599	1994	36	1.48	6.58
395	222	Bison2	DD	DDEOC	Dart	Lanceolate	Clovis	BuffaloRiverChert	D13	Composite	DartH	hit		thorax		0.29	24	26.5	26.1	26.1	98.78	7.57	-2161	627	439		439	128.1	69.1	286.8	75.5	359.7	79.1	0.00226	0.00101	0.00081		2.3	3033.49	0.55	1.28	1.53	1.46	1.01	5599	1994	36	1.48	6.58
398	214	Bison2	DD	DDEOC	Dart	Lanceolate	Clovis	GreenRiverChert	D13	Composite	DartH	hit		abdomen		0.2814	22	24.3	23.9	23.9	80.37	6.73	-875	246	432		432	105.4	58.2	241.7	65.9	338	70.9	0.00267	0.00116	0.00083		2.5	2514.24	0.41	1.04	1.33	1.25	0.97	6290	1980	37	2.35	8.8
403	223	Bison2	DD	DDEOC	Dart	Lanceolate	Clovis	BuffaloRiverChert	D16	Composite	DartH	hit		abdomen		0.465	22	24.3	23	23	122.99	10.7	-783	364	522		522	154	85.7	419.3	93.3	541.8	99.3	0.00302	0.00111	0.00086		2.9	4473.54	0.46	1.34	1.63	1.54	0.92	15267	2280	34	2.84	16.44
408	118	Bison2	DP	GBI1	Dart	Stemmed	Gary	BurlingtonChert	D10	CaneM	DartML	hit		thorax		0.1361	23	25.4	26	26	46	3.54	-1113	151	304		304	87.1	53.7	153.4	57.1	189.7	60.6	0.00156	0.00089	0.00072		1.9	1632.48	0.73	1.41	1.57	1.56	1.23	2587	1978	41
409	154	Bison2	DP	GBI1	Dart	SideNotch		Dacite	D10	CaneM	DartML	hit		thorax		0.1337	24	26.5	25.9	25.9	44.84	3.46	-1402	187	360		360	98.9	56.1	174.8	60	207.4	62.2	0.00135	0.00076	0.00064		1.9	2019.6	0.67	1.3	1.41	1.45	1.11	2361	1944	41
417	246	Bison2	DD	DDEOC	Dart	Lanceolate	AgateBasin	TXChert	D13	Composite	DartH	hit		abdomen		0.2711	21	23.2	22.2	22.2	66.8	6.02	-878	238	306		306	115.6	60	235.5	66.4	302.8	70.6	0.00235	0.00115	0.0009		2.3	1836	0.49	1.11	1.29	1.3	1.01	4678	1962	37	1.35	4.88
421	217	Bison2	DD	DDEOC	Dart	Lanceolate	Clovis	Obsidian	D13	Composite	DartH	hit		thorax		0.2842	21	23.2	22.4	22.4	71.3	6.37	-348	99	586		586	131	72.3	308	78.9	376.5	82.4	0.00217	0.00092	0.00075		2.5	4236.78	0.52	1.29	1.48	1.46	0.97	6259	1994	37	1.55	7.43
[truncated: 6 more columns]

## Sheet: ShotRecordKey
Arm	Armature number
Exp	Carcass experiment
Type	Armature typological categories
Material	Armature material
MS	Mainshaft
m	Mass (kg)
v	Velocity (meters/sec)
KE	Kinetic energy (J)
P	Momentum (kg-m/s)
a	Acceleration (m/s^2)
F	Force (N)
MaxPen	Total penetration (mm)
PenThrough	Penetration through the opposite side of the carcass (mm)
WoundL	Wound length (MaxPen-PenThrough, mm)
TCSA	Tip cross-sectional area (derived from rhomboid equation, thickness measured on the armature, mm^2)
TCSP	Tip cross-sectional perimeter (derived from rhomboid equation, thickness measured on the armature, mm^2)
TCSAh	Tip cross-sectional area (derived from rhomboid equation, thickness measured on the haft, mm^2)
TCSPh	Tip cross-sectional perimeter (derived from rhomboid equation, thickness measured on the haft, mm^2)
TCSAhPV	Tip cross-sectional area (derived from photogrammetry of hafted armature, mm^2)
TCSPhPV	Tip cross-sectional perimeter (derived from photogrammetry of hafted armature, mm^2)
SD	Sectional density (the ratio mass:TCSA, calculated from TCSA)
SDh	Sectional density (calculated from TCSAh)
SDhPV	Sectional density (calculated from TCSAhPV)
Cd	Drag coefficient
CI	Friis-Hansen's "cutting index" (the ratio PR:AR)
WSA	Wound surface area (mm^2)
AR	Area ratio (the ratio TCSA:foreshaft cross-sectional area)
PR	Perimeter ratio (the ratio TCSP:foreshaft circumference)
ARhPV	Area ratio (the ratio TCSAhPV:shaft cross-sectional area)
PRhPV	Perimeter ratio (the ratio TCSPhPV:shaft circumference)
SR	Shaft ratio (the ratio mainshaft diameter:foreshaft diameter)
SA	Surface area (of hafted armatures, measured from photogrammetry)
CM	Center of mass (the balance point of the projectile as a percentage of the overall length measured back from the tip)
BladeL:W	The ratio blade (measured from widest point on the armature) length:width
BladeL:T	The ratio blade length:thickness
BladeW:T	The ratio blade width:thickness
MeanEdge	The mean edge angle of the armature
MeanEdgeSD	The standard deviation of the mean edge angle of the armature
PenAnalysis	For filtering penetration data
AccAnalysis	For filtering acceleration data

## Sheet: Mainshafts
MS	Type	Material	ProxDiam	DistDiam	Length	Mass	DistCirc	CM
A02	Arrow	river cane	6.95	9.3	753	20.9	29.202	390
A03	Arrow	river cane	8.3	9.2	811	26.9	28.888
A04	Arrow	river cane	6.7	10.2	615	19.1	32.028	345
A05	Arrow	river cane	6.3	8.4	740	18.9	26.376	400
A06	Arrow	river cane	6.3	8.8	745	20.2	27.632	405
A07	Arrow	river cane	6.9	7.9	725	20.1	24.806	395
D01	Basketmaker	willow	8.8	13.7	1400	74.2	43.018	780
D01.1	Basketmaker	willow	8.8	13.7	1400	80	43.018	795
D02	Basketmaker	willow	8.9	13.7	1400	74.3	43.018	790
D03	Heavy	green ash	11.1	14.2	1882	181.5	44.588	1082
D04	CaneL	river cane	8.4	12.6	1571	76.7	39.564	901
D05	CaneM	river cane	8.6	13.8	1750	93.8	43.332	990
D07	CaneH	river cane	10.2	15.9	1960	150.1	49.926	1100
D07.1	CaneH	river cane	10.2	18.2	1960	159.3	57.148	1100
D08	Basketmaker	willow	8.9	14	1530	85	43.96	850
D09	Basketmaker	willow	8.4	13.6	1530	76.9	42.704	870
D10	CaneM	river cane	8.6	15.2	1740	108.2	47.728	990
D13	Composite	tonkin cane and ash	10.2	17.4	1785	229.1	54.636	1115
D16	Composite	tonkin cane and oak	7.8	19	2038	342.9	59.66	1283

## Sheet: HaftedArmatures
Arm	Type1	Type2	Material	PTLength	PTMass	PTWidth	PTThick	FSDiam	FSHaftWidth	FSLengthInSocket	FSMass	FSCirc	FSCSA	MS
5	Dart	Lanceolate	ReedsSpringChert	64	9.5	21	7.9	10.4	11.4	205	23.3	32.656	84.9056	D04
7	Dart	Lanceolate	ReedsSpringChert	44	5.8	24	6.9	13	10.8	183	19.8	40.82	132.665	D03
8	Dart	Lanceolate	ReedsSpringChert	38	3.9	29	6.6	9.6	10	118	19.7	30.144	72.3456	D09
9	Arrow	CornerNotch	Siltstone	39	5.4	19	7.6	8.6	9.7	141	8.6	27.004	58.0586	A02
14	Arrow	CornerNotch	ReedsSpringChert	39	5.1	23	8.1	9.8	11.4	95	8.1	30.772	75.3914	A04
19	Arrow	CornerNotch	ReedsSpringChert	53	5.2	16	6.5	9.1	8.7	200	12.6	28.574	65.0058	A02
24	Dart	Stemmed	ReedsSpringChert	45	4.7	25	5.4	10	9.2	275	20.6	31.4	78.5	D03
25	Dart	Stemmed	ReedsSpringChert	55	10.9	29	7.4	12.4	12.3	141	21.5	38.936	120.702	D03
27	Dart	Stemmed	ReedsSpringChert		6.2	24	6.5	9.9	6.4	172	15.1	31.086	76.9378	D04
28	Dart	CornerNotch	BrazilianAgate	50	7.1	25	6	9	10	130	12	28.26	63.585	D09
30	Dart	CornerNotch	BrazilianAgate	45	7.1	26	5.4	10.4	11.3	145	14.7	32.656	84.9056	D01
31	Dart	CornerNotch	BrazilianAgate	43	4.9	21	4.3	9.7	10.7	255	14.2	30.458	73.8607	D08
33	Dart	CornerNotch	BrazilianAgate	49	6.8	24	6	10.9	11.7	180	16.2	34.226	93.2659	D01
34	Dart	CornerNotch	BrazilianAgate	40	5.5	26	5	10.3	10	112	10.7	32.342	83.2806	D01
36	Dart	CornerNotch	BrazilianAgate		7.5	25	5.3	10.5	10.8	143	14.4	32.97	86.5463	D01
40	Dart	CornerNotch	BrazilianAgate	45	6.6	28	4.8	10.2	11.4	262	17.1	32.028	81.6714	D08
41.1	Dart	CornerNotch	BrazilianAgate		5.6	24	4.6	11.3	12.4	158	15.2	35.482	100.237	D01.1
42	Dart	CornerNotch	BrazilianAgate		7	23	5.8	9.6	10.8	152	12.7	30.144	72.3456	D02
48	Dart	CornerNotch	ReedsSpringChert		11.3	38	6	14.5	10.1	194	23.3	45.53	165.046	D05
51	Dart	Stemmed	ReedsSpringChert	66	15.4	30	7	11.8	13.4	153	24.5	37.052	109.303	D05
53	Dart	CornerNotch	IndianAgate	48	7.9	27	6.2	11.8	11.6	140	16	37.052	109.303	D01
55	Dart	CornerNotch	IndianAgate	44	6.7	25	6	10.3	11.3	135	13	32.342	83.2806	D01
56	Dart	SideNotch	Basalt	58	7.2	23	5.7	11.2	11.3	140	14.3	35.168	98.4704	D03
59	Dart	Lanceolate	Porcelain		15.6	26	8.4	12.3	12.7	262	35.3	38.622	118.763	D05
64	Dart	CornerNotch	ReedsSpringChert	57	9	26	6.1	12.2	12.2	246	29.2	38.308	116.839	D04
75	Arrow	Stemmed	BurlingtonChert	29	1.5	19	3.8	6.6	6.1	187	6.9	20.724	34.1946	A04
76	Dart	Lanceolate	BurlingtonChert	87	15.7	25	8	12.7	13.2	270	39.1	39.878	126.613	D05
77	Dart	Lanceolate	BurlingtonChert	74	12.7	23	7.4	12.7	12.2	262	35.5	39.878	126.613	D04
78	Dart	Lanceolate	BurlingtonChert	82	14.9	26	7.6	12.7	12.9	265	37.2	39.878	126.613	D05
79	Dart	Lanceolate	BurlingtonChert	52	7.2	21	6.3	12.7	11.2	242	29.9	39.878	126.613	D04
81	Dart	Lanceolate	Porcelain	62	8.1	28	4.9	12.2	12.2	125	20.5	38.308	116.839	D05
83	Dart	SideNotch	BurlingtonChert	71	27.8	47	8.4	12.8	12.6	263	51.1	40.192	128.614	D05
84	Dart	SideNotch	BurlingtonChert	64	16.1	39	8.3	12.7	12.4	255	39.1	39.878	126.613	D05
85	Dart	CornerNotch	BurlingtonChert	59	11.5	23	7.8	9.5	9.8	70	18.8	29.83	70.8462	D02
87	Dart	CornerNotch	TXChert	60	9.5	28	5.3	9.6	9.4	122	14.9	30.144	72.3456	D01
89	Arrow	CornerNotch	BurlingtonChert	55	5.6	24	5.6	8.8	10.6	130	10.6	27.632	60.7904	A05
90	Dart	CornerNotch	Jasper	43	4.6	24	5.4	9.1	9.2	125	9.9	28.574	65.0058	D02
91	Arrow	Triangular	Obsidian	39	4	21	6	8.2	10	138	8.3	25.748	52.7834	A06
94	Arrow	BasalNotch	BrazilianAgate	35.5	2.4	21	3.5	7.9	8.3	90	5.4	24.806	48.9918	A06
95	Dart	CornerNotch	Novaculite	65	16.5	38.9	7.9	13.5	14.4	227	29.3	42.39	143.066	D07
96	Arrow	Triangular	BurlingtonChert	20		15.6	3.6	7.4	6.9	100	4.6	23.236	42.9866	A05
97	Arrow	CornerNotch	BurlingtonChert	30		13.6	4	7.7	8.4	116	5.5	24.178	46.5427	A05
106	Dart	CornerNotch	Novaculite	68.2	12.6	28	6.2	11.1	12.9	208	19.9	34.854	96.7198	D04
108	Dart	CornerNotch	BurlingtonChert	52	8.9	26.6	6.6	9.3	11.4	17	15.4	29.202	67.8946	D01
110	Arrow	SideNotch	BurlingtonChert	38.1	2.9	18.9	4.5	8.9	10.2	113	6.7	27.946	62.1799	A06
118	Dart	Stemmed	BurlingtonChert	50	7.6	26	6.7	12.4	11.8	238	27.9	38.936	120.702	D10
120	Dart	SideNotch	BurlingtonChert	47	10.3	33	7.5	11.6	14.4	155	22.1	36.424	105.63	D04
122	Dart	CornerNotch	Novaculite	55	15.1	45	7.2	13.8	15.9	186	26.5	43.332	149.495	D07
124	Dart	CornerNotch	Novaculite	47	11.4	41	6.9	14.7	16.4	215	26.2	46.158	169.631	D05
127	Dart	Lanceolate	TXChert	64	12.5	25.3	7.3	12	14	248	30.2	37.68	113.04	D05
135	Dart	Lanceolate	Novaculite	81	19.9	25.6	7.9	14	15.5	270	48.6	43.96	153.86	D07.1
136	Dart	Lanceolate	BurlingtonChert	98	24.7	26.1	8.9	14	15.7	286	54.2	43.96	153.86	D07
152	Dart	CornerNotch	Dacite	62	8.5	29.4	6.3	12	12.5	245	22.3	37.68	113.04	D08
154	Dart	SideNotch	Dacite	50	7.3	27.1	7.3	13.7	12.9	204	25.5	43.018	147.337	D10
157	Arrow	SideNotch	BurlingtonChert	38	3	16.7	4.8	8	9.4	134	7.4	25.12	50.24	A05
159	Arrow	SideNotch	BurlingtonChert	39	2.6	18.3	3.9	8.9	10.5	130	7.7	27.946	62.1799	A06
170	Dart	Lanceolate	Obsidian	139	52.6	32.4	10	16	18.5	250	77.7	50.24	200.96	D07
171	Dart	Lanceolate	TXChert	76	19.6	28.7	7.3	17.6	17.8	199	51.2	55.264	243.162	D13
172	Dart	Lanceolate	TXChert	99	11.4	25.1	7.8	12	14.5	270	34	37.68	113.04	D05
174	Dart	Lanceolate	TXChert	74	13.9	27.2	6.3	13	15	285	31.3	40.82	132.665	D07
178	Dart	Lanceolate	TXChert	81	21.8	31.5	8	17.8	17.5	249	62	55.892	248.719	D13
214	Dart	Lanceolate	GreenRiverChert	102	24	28.1	7.5	18	17.2	195	52.3	56.52	254.34	D13
217	Dart	Lanceolate	Obsidian	90	22.1	35.4	7.4	18	17.4	209	55.1	56.52	254.34	D13
219	Dart	Lanceolate	Obsidian	70	13.3	31.5	6.4	17	18.3	205	32.6	53.38	226.865	D07.1
221	Dart	Lanceolate	BuffaloRiverChert	96	32.4	37.1	6.8	17.3	18.5	246	73.4	54.322	234.943	D13
222	Dart	Lanceolate	BuffaloRiverChert	87	29.3	33.7	7.6	17.3	17.02	209	60.9	54.322	234.943	D13
223	Dart	Lanceolate	BuffaloRiverChert	174	73.7	42.2	7.3	20.6	19.87	242	122.1	64.684	333.123	D16
224	Dart	Lanceolate	Novaculite	112	49.9	36.2	10.4	17.9	19.4	222	84.7	56.206	251.522	D13
228	Dart	Lanceolate	Quartzite	62	9.1	23.8	4.8	15.8	17.33	171	39	49.612	195.967	D07.1
231	Dart	Lanceolate	TXChert	53	5.5	21	4.4	15.6	14.24	164	31.9	48.984	191.038	D07.1
237	Dart	Lanceolate	Porcelain	62	6.41	22.8	3.9	17.5	15.76	144	33.5	54.95	240.406	D07.1
240	Dart	Lanceolate	Porcelain	60	5.95	22.3	3.9	16	15.3	165	26	50.24	200.96	D07.1
242	Dart	Lanceolate	TXChert	118	26.5	29.2	7.46	16.3	15.8	237	58.1	51.182	208.567	D07.1
244	Dart	Lanceolate	TXChert	96	21.4	27.3	7.8	14.4	15.27	182	39.2	45.216	162.778	D07.1
246	Dart	Lanceolate	TXChert	82	19.5	28.9	8	17.3	16.3	177	42	54.322	234.943	D13
